# Supplementary material
Source: publisher figshare collection journal article supplement (https://gsapubs.figshare.com/ndownloader/files/23314805)
Supplement: Supplementary file 1 [file 23314805]

## Sheet: K-3 orange and rind glass
K-3 glass compositions
Average glass compositions for K-3 orange palagonitized pumice above the coarse ash
T: MgO is temperature from Helz and Thornber, 1987
No. is number of points averaged in analysis.
No.	SiO2	Al2O3	FeO	MgO	CaO	Na2O	K2O	TiO2	MnO	P2O5	Total	locality	T:MgO
3	52.234	14.23	10.992	6.62	10.565	2.33	0.526	2.74567	0.166667	0.267667	100.677	Kipuka Iki	1147.06
3	52.132	14.133	10.6153	6.18433	11.494	2.47967	0.464667	2.66367	0.170667	0.242667	100.58	Kipuka Iki	1138.31
3	51.4287	13.9883	11.1183	6.664	10.7227	2.251	0.522667	2.73933	0.159667	0.282667	99.8773	Kipuka Iki	1147.95
3	52.07	13.9823	10.737	6.31467	10.9787	2.5	0.500667	2.799	0.144	0.277333	100.304	F07-3	1140.92
3	51.45	14.007	10.8113	6.77233	10.7243	2.45667	0.504	2.69767	0.186667	0.306333	99.9163	F07-3	1150.12
2	51.3685	13.9865	10.854	6.743	10.9105	2.388	0.5115	2.716	0.157	0.2685	99.9035	F07-3	1149.53
3	50.8713	13.7553	10.8067	6.438	10.9477	2.3	0.522	2.748	0.177333	0.28	98.8463	F07-3	1143.4
4	51.4138	14.036	11.0915	6.6785	10.738	2.2785	0.517	2.6235	0.16275	0.2725	99.812	S4-27E	1148.24
10	50.8494	13.1087	12.7645	5.8475	10.0616	2.129	0.6171	3.1016	0.1923	0.3147	98.9864	F4-69E-16	1131.53
16	50.7564	12.981	12.5299	5.8545	10.0909	2.51206	0.630062	3.11963	0.191062	0.326875	98.9924	F02-1-6-20	1131.68
Average glass compositions of glass at the contact of the core and rind of cored bombs.
T: MgO is temperature from Helz and Thornber, 1987
No. is number of points averaged in analysis.
No.	SiO2	Al2O3	FeO	MgO	CaO	Na2O	K2O	TiO2	MnO	P2O5	Total	sample	T:MgO
11	51.1506	12.4955	13.7685	5.22536	9.49736	2.58245	0.737364	3.77255	0.246909	0.376	99.8526	F0-23-2	1119.03
5	51.0176	13.1686	11.8466	6.482	10.037	2.2746	0.6018	2.7686	0.1744	0.2522	98.6234	F0-25-13b	1144.29
9	51.0896	12.5311	13.0428	5.6631	9.3532	2.3202	0.6744	3.3131	0.2242	0.3394	98.5511	F0-25-13d	1127.83
4	50.919	12.723	12.7578	5.59275	9.582	2.43425	0.97225	3.26775	0.16925	0.3385	98.7565	42-2b	1126.41
13	51.0472	12.7012	13.0965	5.47708	9.45831	2.479	1.04746	3.45123	0.204769	0.357385	99.3202	42-2a	1124.09
7	50.4871	12.5366	13.9413	5.12714	9.35286	2.42429	0.722429	3.61571	0.227286	0.402571	98.8373	8-07	1117.06

## Sheet:  F4-69 K-3 glass
F4-69 Kulana 3 1-2mm vitric clasts
A is the top E is the coarse ash and G is the base.
avg is average of analyses for that slice
T: MgO is temperature from Helz and Thornber, 1987
	SiO2	Al2O3	FeO	MgO	CaO	Na2O	K2O	TiO2	MnO	P2O5	Total	slice	T:MgO
8	51.289	13.262	12.052	6.036	10.677	1.482	0.549	2.944	0.186	0.296	98.773	F4-69A	1135.32
9	51.663	13.72	11.008	5.977	10.565	1.794	0.555	2.915	0.226	0.311	98.734	F4-69A	1134.14
10	51.112	13.832	10.552	6.387	11.152	2.185	0.48	2.587	0.201	0.252	98.74	F4-69A	1142.38
11	51.345	12.917	12.761	5.424	9.547	1.841	0.643	3.321	0.198	0.343	98.34	F4-69A	1123.02
12	51.82	13.467	11.568	5.916	10.395	1.705	0.593	3.067	0.234	0.305	99.07	F4-69A	1132.91
13	52.108	13.65	11.054	5.849	10.395	1.545	0.579	2.975	0.186	0.314	98.655	F4-69A	1131.56
14	51.666	13.763	11.016	6.026	10.627	1.271	0.516	2.699	0.204	0.267	98.055	F4-69A	1135.12
15	52.467	13.778	10.811	5.953	10.182	1.265	0.606	3.219	0.175	0.335	98.791	F4-69A	1133.66
16	51.899	13.655	10.784	6.186	10.626	1.308	0.553	2.815	0.145	0.309	98.28	F4-69A	1138.34
17	51.518	13.608	10.969	6.008	10.81	1.328	0.57	2.833	0.188	0.283	98.115	F4-69A	1134.76
18	52.211	13.506	11.498	5.692	10.445	1.247	0.582	2.947	0.135	0.316	98.579	F4-69A	1128.41
19	51.675	14.326	11.171	5.792	10.95	1.415	0.503	2.607	0.183	0.237	98.859	F4-69A	1130.42
20	52.197	13.606	10.798	6.054	10.261	1.622	0.566	2.986	0.221	0.321	98.632	F4-69A	1135.69
21	52.118	13.552	11.685	5.86	10.381	1.047	0.573	2.905	0.15	0.274	98.545	F4-69A	1131.79
22	51.628	13.652	11.151	6.125	10.648	2.155	0.556	2.799	0.159	0.285	99.158	F4-69A	1137.11
23	51.665	13.672	10.824	6.274	10.747	1.935	0.503	2.7	0.231	0.295	98.846	F4-69A	1140.11
avg	51.7738	13.6229	11.2314	5.97244	10.5255	1.57156	0.557937	2.89494	0.188875	0.296438	98.6357	F4-69A	1134.05
24	51.314	13.85	10.307	6.264	11.137	2.031	0.486	2.541	0.105	0.262	98.297	F4-69B	1139.91
25	51.767	13.25	11.632	5.884	10.144	1.559	0.593	3.101	0.205	0.33	98.465	F4-69B	1132.27
26	51.58	13.73	11.151	6.398	11.075	1.822	0.467	2.535	0.111	0.239	99.108	F4-69B	1142.6
27	51.722	13.89	10.543	6.031	11.18	2.246	0.507	2.624	0.183	0.251	99.177	F4-69B	1135.22
28	52.008	13.07	12.122	5.402	9.645	1.218	0.675	3.522	0.19	0.408	98.26	F4-69B	1122.58
29	51.034	13.678	10.927	6.475	11.054	2.118	0.489	2.577	0.178	0.269	98.799	F4-69B	1144.15
30	51.749	13.596	11.555	5.851	10.504	1.305	0.555	2.88	0.188	0.299	98.482	F4-69B	1131.61
31	51.673	13.674	10.584	6.37	10.793	2.08	0.502	2.654	0.147	0.274	98.751	F4-69B	1142.04
32	51.35	13.834	10.492	6.371	11.124	2.148	0.497	2.546	0.175	0.242	98.779	F4-69B	1142.06
33	52.057	13.493	11.203	5.981	10.335	1.784	0.574	2.97	0.2	0.302	98.899	F4-69B	1134.22
34	51.62	13.856	10.332	6.124	10.94	1.812	0.536	2.7	0.137	0.264	98.321	F4-69B	1137.09
35	51.459	13.476	11.216	5.774	10.693	1.764	0.543	2.882	0.19	0.311	98.308	F4-69B	1130.06
avg	51.6111	13.6164	11.0053	6.07708	10.7187	1.82392	0.535333	2.79433	0.167417	0.287583	98.6372	F4-69B	1136.15
36	52.068	14.354	10.542	6.408	11.169	2.023	0.476	2.548	0.202	0.255	100.045	F4-69C	1142.8
37	51.516	13.708	10.371	6.321	11.36	2.223	0.484	2.502	0.212	0.265	98.962	F4-69C	1141.05
38	51.24	13.935	10.294	5.846	11.232	1.889	0.496	2.643	0.182	0.293	98.05	F4-69C	1131.5
39	51.232	13.564	10.947	6.246	10.868	1.841	0.529	2.811	0.174	0.275	98.487	F4-69C	1139.54
40	51.763	13.881	10.803	6.26	10.915	1.756	0.529	2.749	0.175	0.264	99.095	F4-69C	1139.83
41	51.416	13.739	10.884	6.093	11.233	2.245	0.489	2.64	0.154	0.254	99.147	F4-69C	1136.47
42	51.086	13.332	11.32	5.896	10.624	1.965	0.553	2.777	0.211	0.3	98.064	F4-69C	1132.51
43	51.33	13.583	11.093	5.846	10.853	1.842	0.527	2.67	0.196	0.29	98.23	F4-69C	1131.5
44	50.813	13.829	10.657	6.303	10.82	2.22	0.553	2.593	0.184	0.292	98.264	F4-69C	1140.69
45	51.163	13.8	10.556	6.386	11.093	2.318	0.483	2.485	0.182	0.269	98.735	F4-69C	1142.36
46	51.008	13.628	10.807	6.313	11.097	1.96	0.501	2.649	0.162	0.257	98.382	F4-69C	1140.89
47	51.429	13.949	10.528	6.614	11.342	2.139	0.497	2.494	0.162	0.239	99.393	F4-69C	1146.94
48	51.321	13.781	10.3	6.316	11.375	2.169	0.479	2.534	0.141	0.254	98.67	F4-69C	1140.95
49	50.96	13.628	10.666	6.37	11.079	2.114	0.487	2.526	0.192	0.255	98.277	F4-69C	1142.04
avg	51.3104	13.7651	10.6977	6.22986	11.0757	2.05029	0.505929	2.61579	0.180643	0.268714	98.7001	F4-69C	1139.22
50	52.002	14.36	10.545	5.71	11.242	1.845	0.489	2.583	0.219	0.281	99.276	F4-69D	1128.77
51	51.725	13.973	10.632	6.349	11.144	2.325	0.478	2.527	0.154	0.259	99.566	F4-69D	1141.61
52	51.776	14.146	10.319	6.132	11.316	2.1	0.475	2.6	0.176	0.262	99.302	F4-69D	1137.25
53	51.871	14.101	10.475	6.079	11.314	2.246	0.488	2.541	0.157	0.23	99.502	F4-69D	1136.19
54	51.647	13.848	10.782	6.233	11.208	2.022	0.477	2.615	0.241	0.248	99.321	F4-69D	1139.28
55	51.555	13.827	10.459	6.163	11.182	2.367	0.495	2.576	0.268	0.224	99.116	F4-69D	1137.88
56	51.503	13.921	10.347	6.44	11.234	2.329	0.489	2.527	0.15	0.268	99.208	F4-69D	1143.44
57	51.719	14.098	11.154	6.39	11.276	1.669	0.496	2.532	0.19	0.242	99.766	F4-69D	1142.44
58	52.132	14.118	10.665	6.349	11.082	1.904	0.516	2.604	0.215	0.263	99.848	F4-69D	1141.61
59	51.663	14	10.395	6.448	11.185	2.323	0.479	2.473	0.223	0.263	99.452	F4-69D	1143.6
60	52.102	14.002	10.425	6.209	11.156	1.862	0.488	2.556	0.205	0.247	99.252	F4-69D	1138.8
61	51.151	12.66	13.029	5.17	9.558	2.146	0.711	3.459	0.178	0.358	98.42	F4-69D	1117.92
62	50.779	13.706	10.646	6.494	11.461	2.254	0.488	2.547	0.221	0.25	98.846	F4-69D	1144.53
63	51.772	14.113	10.791	6.399	11.261	2.349	0.479	2.515	0.218	0.242	100.139	F4-69D	1142.62
64	51.156	14.022	11.239	6.402	10.85	2.284	0.544	2.696	0.225	0.261	99.679	F4-69D	1142.68
65	51.707	14.396	10.91	5.776	11.321	2.199	0.495	2.608	0.197	0.234	99.843	F4-69D	1130.1
avg	51.6412	13.9557	10.8008	6.17144	11.1119	2.139	0.505437	2.62244	0.202313	0.25825	99.4085	F4-69D	1138.05
66	51.571	13.449	11.469	5.968	10.765	2.33	0.573	2.876	0.18	0.269	99.45	F4-69E	1133.96
67	51.8	13.699	11.317	6.21	10.572	2.37	0.557	2.741	0.177	0.29	99.733	F4-69E	1138.82
68	51.958	13.466	11.888	6.106	10.206	2.016	0.592	2.815	0.212	0.289	99.548	F4-69E	1136.73
69	52.168	13.764	10.59	6.268	10.506	2.091	0.543	2.793	0.22	0.288	99.231	F4-69E	1139.99
70	51.542	13.68	11.492	6.246	10.761	2.359	0.566	2.781	0.23	0.265	99.922	F4-69E	1139.54
71	52.073	13.601	11.784	5.929	10.578	1.948	0.565	2.927	0.188	0.294	99.887	F4-69E	1133.17
72	51.711	13.403	11.457	6.119	10.517	2.418	0.59	2.847	0.136	0.29	99.488	F4-69E	1136.99
73	51.058	13.486	11.104	6.095	10.727	2.248	0.558	2.731	0.24	0.248	98.495	F4-69E	1136.51
74	51.749	13.695	11.513	6.224	10.66	2.413	0.547	2.694	0.151	0.261	99.907	F4-69E	1139.1
75	51.606	13.598	11.375	6.112	10.703	2.342	0.564	2.783	0.165	0.287	99.535	F4-69E	1136.85
avg	51.7236	13.5841	11.3989	6.1277	10.5995	2.2535	0.5655	2.7988	0.1899	0.2781	99.5196	F4-69E	1137.17
76	52.008	13.435	12.387	5.418	9.979	2.026	0.645	3.245	0.178	0.351	99.672	F4-69F	1122.9
77	51.491	13.518	11.392	6.145	10.9	2.424	0.562	2.829	0.157	0.279	99.697	F4-69F	1137.51
78	52.013	13.348	12.89	5.577	10.166	1.962	0.619	2.933	0.22	0.332	100.06	F4-69F	1126.1
79	51.091	12.911	12.317	5.059	9.64	2.217	0.7	3.409	0.179	0.342	97.865	F4-69F	1115.69
80	51.886	12.951	13.456	4.78	9.505	1.986	0.719	3.633	0.213	0.358	99.487	F4-69F	1110.08
81	52.257	13.117	12.556	5.144	9.636	2.32	0.669	3.335	0.219	0.361	99.614	F4-69F	1117.39
82	51.595	13.531	11.526	5.886	10.827	2.253	0.536	2.86	0.252	0.305	99.571	F4-69F	1132.31
83	51.717	13.543	11.63	6.122	10.511	2.437	0.549	2.818	0.185	0.273	99.785	F4-69F	1137.05
84	51.823	13.362	11.359	6.036	10.674	2.445	0.57	2.775	0.151	0.255	99.45	F4-69F	1135.32
85	51.705	13.356	11.882	5.827	10.26	2.264	0.611	2.996	0.224	0.314	99.439	F4-69F	1131.12
86	51.628	12.967	12.897	5.446	9.956	2.147	0.672	3.378	0.211	0.334	99.636	F4-69F	1123.46
87	51.779	13.666	11.504	6.11	10.62	2.169	0.559	2.79	0.217	0.289	99.703	F4-69F	1136.81
88	51.833	13.918	10.67	6.399	11.193	2.159	0.489	2.539	0.116	0.245	99.561	F4-69F	1142.62
89	53.336	12.844	11.472	4.654	8.168	2.085	1.073	4.837	0.199	0.66	99.328	F4-69F	1107.55
90	51.845	13.523	11.826	6.119	10.418	2.32	0.582	2.837	0.184	0.306	99.96	F4-69F	1136.99
91	51.691	13.512	11.501	5.971	10.618	2.403	0.583	2.671	0.21	0.305	99.465	F4-69F	1134.02
92	51.63	13.463	11.709	6.175	10.688	2.402	0.566	2.752	0.172	0.315	99.872	F4-69F	1138.12
avg	51.8428	13.3509	11.9396	5.69812	10.2211	2.23641	0.629647	3.09629	0.193353	0.330824	99.5391	F4-69F	1128.53
93	51.533	13.422	11.875	5.894	10.494	2.472	0.573	2.837	0.166	0.313	99.579	F4-69G	1132.47
94	51.705	13.542	11.682	6.078	10.56	2.117	0.54	2.708	0.206	0.299	99.437	F4-69G	1136.17
95	51.425	14.182	11.048	6.408	10.761	2.179	0.543	2.667	0.22	0.279	99.712	F4-69G	1142.8
96	51.942	13.845	10.421	6.501	10.721	2.225	0.5	2.604	0.161	0.251	99.171	F4-69G	1144.67
97	51.59	13.673	10.989	6.121	10.589	2.418	0.552	2.824	0.195	0.263	99.214	F4-69G	1137.03
99	51.559	13.921	10.117	6.321	11.144	2.356	0.508	2.544	0.174	0.249	98.893	F4-69G	1141.05
100	51.758	13.914	10.577	6.42	11.376	2.237	0.478	2.555	0.174	0.251	99.74	F4-69G	1143.04
101	51.474	12.721	13.337	5.287	9.43	2.172	0.687	3.363	0.208	0.372	99.051	F4-69G	1120.27
102	51.761	13.378	11.63	6.177	10.527	2.426	0.573	2.738	0.213	0.283	99.706	F4-69G	1138.16
103	51.702	13.532	11.306	6.143	10.59	2.167	0.558	2.762	0.21	0.286	99.256	F4-69G	1137.47
104	51.385	13.229	11.194	6.023	10.573	1.684	0.598	2.76	0.217	0.296	97.959	F4-69G	1135.06
105	50.921	13.776	10.169	6.448	10.986	2.099	0.461	2.405	0.115	0.235	97.615	F4-69G	1143.6
106	49.527	13.25	9.626	6.384	10.587	2.278	0.46	2.329	0.212	0.242	94.895	F4-69G	1142.32
107	51.475	13.45	11.142	6.032	10.63	2.284	0.561	2.798	0.148	0.287	98.807	F4-69G	1135.24
108	51.377	13.936	10.585	6.537	11.014	2.356	0.476	2.43	0.203	0.23	99.144	F4-69G	1145.39
avg	51.4089	13.5847	11.0465	6.18493	10.6655	2.23133	0.537867	2.68827	0.188133	0.275733	98.8119	F4-69G	1138.32
